# Supplementary material for: A comparison of the predictive accuracy of three screening models for pulmonary arterial hypertension in systemic sclerosis
Source: Springer Nature journal article supplement (doi:10.1186/s13075-015-0517-5), 2015-01-15
Supplement: MOESM1 [file 9783468]

## Additional file

### *Details of the “alternate case scenario analysis”*

An alternate case scenario analysis was performed, setting the prevalence of PAH to the commonly accepted 10%, using the previously determined point estimates of sensitivity and specificity. The equations below were used to calculate the adjusted positive predictive value (PPV) and negative predictive value (NPV):

$$\text{PPV} = \frac{(\text{sensitivity}) * (\text{prevalence})}{(\text{sensitivity}) * (\text{prevalence}) + (1 - \text{specificity}) * (1 - \text{prevalence})}$$

$$\text{NPV} = \frac{(\text{specificity}) * (1 - \text{prevalence})}{(\text{specificity}) * (1 - \text{prevalence}) + (1 - \text{sensitivity}) * (\text{prevalence})}$$

### **1. DETECT screening algorithm**

Using the equations above, and assuming an SSc-PAH prevalence=10%, sensitivity=100% and specificity=35.3%, the ‘adjusted’ PPV and NPV for SSc-PAH using the DETECT screening algorithm were 14.7% and 100%, respectively.

Supplementary Table 1 - Two-by-two tables for the DETECT screening algorithm assuming an SSc-PAH prevalence of 10%.

|                                  |          | SSc-PAH |    | Total |
|----------------------------------|----------|---------|----|-------|
|                                  |          | Yes     | No |       |
| DETECT<br>screening<br>algorithm | Positive | 6       | 35 | 41    |
|                                  | Negative | 0       | 20 | 20    |
| Total                            |          | 6       | 55 | 61    |

## 2. ASIG screening algorithm

Assuming an SSc-PAH prevalence=10%, sensitivity=100% and specificity=54.5%, the ‘adjusted’ PPV and NPV for SSc-PAH using the ASIG screening algorithm were 19.6% and 100%, respectively.

Supplementary Table 2 - Two-by-two tables for the ASIG screening algorithm assuming an SSc-PAH prevalence of 10%.

|                                |          | SSc-PAH |    | Total |
|--------------------------------|----------|---------|----|-------|
|                                |          | Yes     | No |       |
| ASIG<br>screening<br>algorithm | Positive | 4       | 16 | 20    |
|                                | Negative | 0       | 17 | 17    |
| Total                          |          | 4       | 33 | 37    |

### 3. ESC/ERS screening guidelines

Assuming an SSc-PAH prevalence =10%, sensitivity = 96.3%, specificity=32.3%, the ‘adjusted’ PPV and NPV for SSc-PAH using the ESC/ERS screening model were 13.6% and 98.7%, respectively.

Supplementary Table 3 - Two-by-two tables for theESC/ERS screening model assuming an SSc-PAH prevalence of 10%.

|                                    |          | SSc-PAH |    | Total |
|------------------------------------|----------|---------|----|-------|
|                                    |          | Yes     | No |       |
| ESC/ERS<br>screening<br>guidelines | Positive | 6       | 38 | 44    |
|                                    | Negative | 0       | 14 | 14    |
| Total                              |          | 6       | 52 | 58    |
